# Supplementary material for: Impact of C‐terminal truncations in the Arabidopsis Rab escort protein (REP) on REP–Rab interaction and plant fertility
Source: PubMed Central journal article supplement (PMC9293207; doi:10.1111/tpj.15519), 2021-10-16
Supplement: TPJ-108-1400-s001.pdf [file TPJ-108-1400-s001.pdf]

**SUPPLEMENTARY MATERIAL**

**Impact of C-terminal truncations in the *Arabidopsis* Rab Escort Protein (*REP*) on REP-Rab interaction and plant fertility**

**Fig. S1**

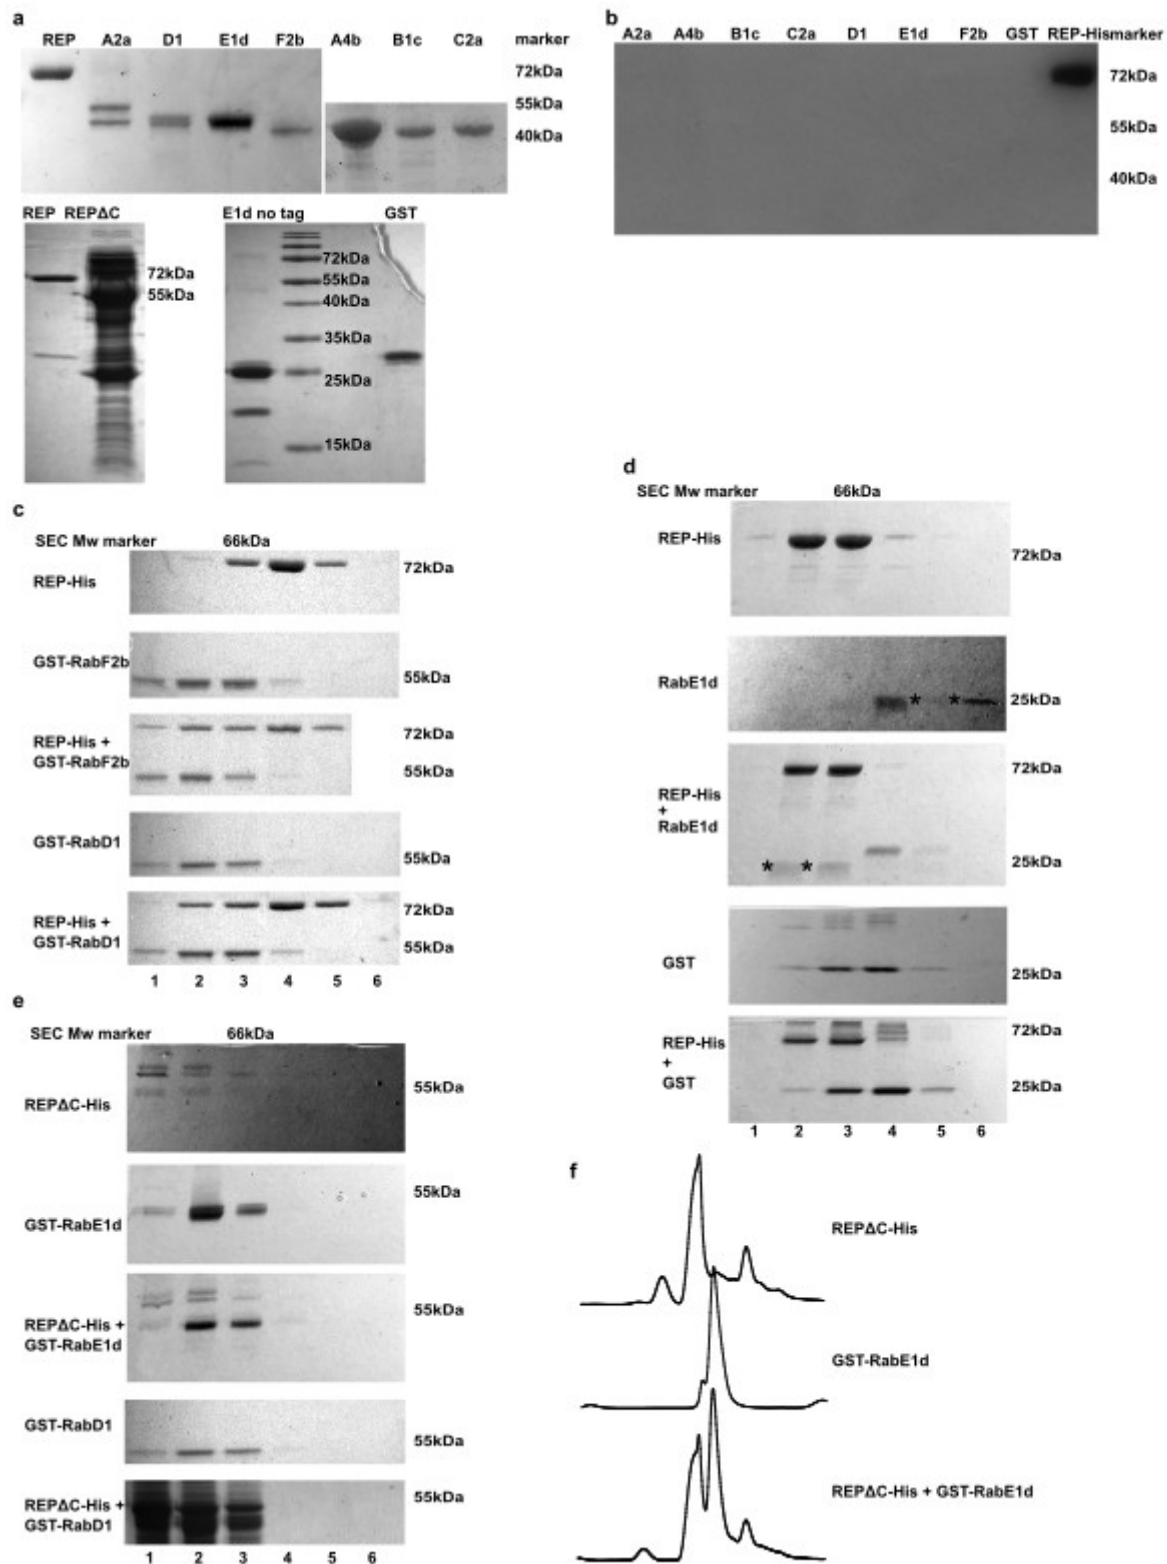

**Fig. S1 Control experiments for the *in vitro* interaction of REP-His with GST-Rabs**

**a)** Purity of proteins used for *in vitro* experiments. Equal amounts of the protein preparations were resolved on SDS-PAGE and stained with CBB R-450. **b)** None of the GST-Rab proteins used for the blot overlay assays is recognized by the anti-His antibody, Western blot, equal amounts of the proteins were loaded. **c)** GST-RabF2b and GST-RabD1 bind to REP-His. SDS-PAGE gels from the SEC runs shown on Fig. 1e. **d)** RabE1d cleaved from its GST tag interacts with REP-His (upper panels). Asterisks denote RabE1d bands, note the unspecific band of slightly slower electrophoretic mobility that does not bind to REP. The respective chromatogram is shown on Fig. 1f. The GST alone does not bind to REP-His (lower panels). **e,f)** REP $\Delta$ C-His migrates with the void volume of the column, probably due to oligomerization, but binds GST-RabD1 (see also chromatogram Fig. 1g) and GST-RabE1d (shown on chromatogram Fig. S1f). The same control for GST-RabE1d interaction with REP-His and REP $\Delta$ C-His was used (SDS-PAGE gels shown on Fig. 1d and Fig. S1e) and the same control for GST-RabD1 interaction with REP-His and REP $\Delta$ C-His was used (SDS-PAGE gels shown on Fig. S1c and Fig. S1e).



**Fig. S2 Peptide libraries for proteins used for the HDX-MS experiments**

a) REP-His, b) RabF2b, c) RabD1 and d) RabE1d proteins were sequenced by the means of MS after pepsin cleavage. Peptide coverage maps were created by the program Draw Map. The maps were used as libraries for peptides derived from the HDX-MS experiments.

Fig. S3

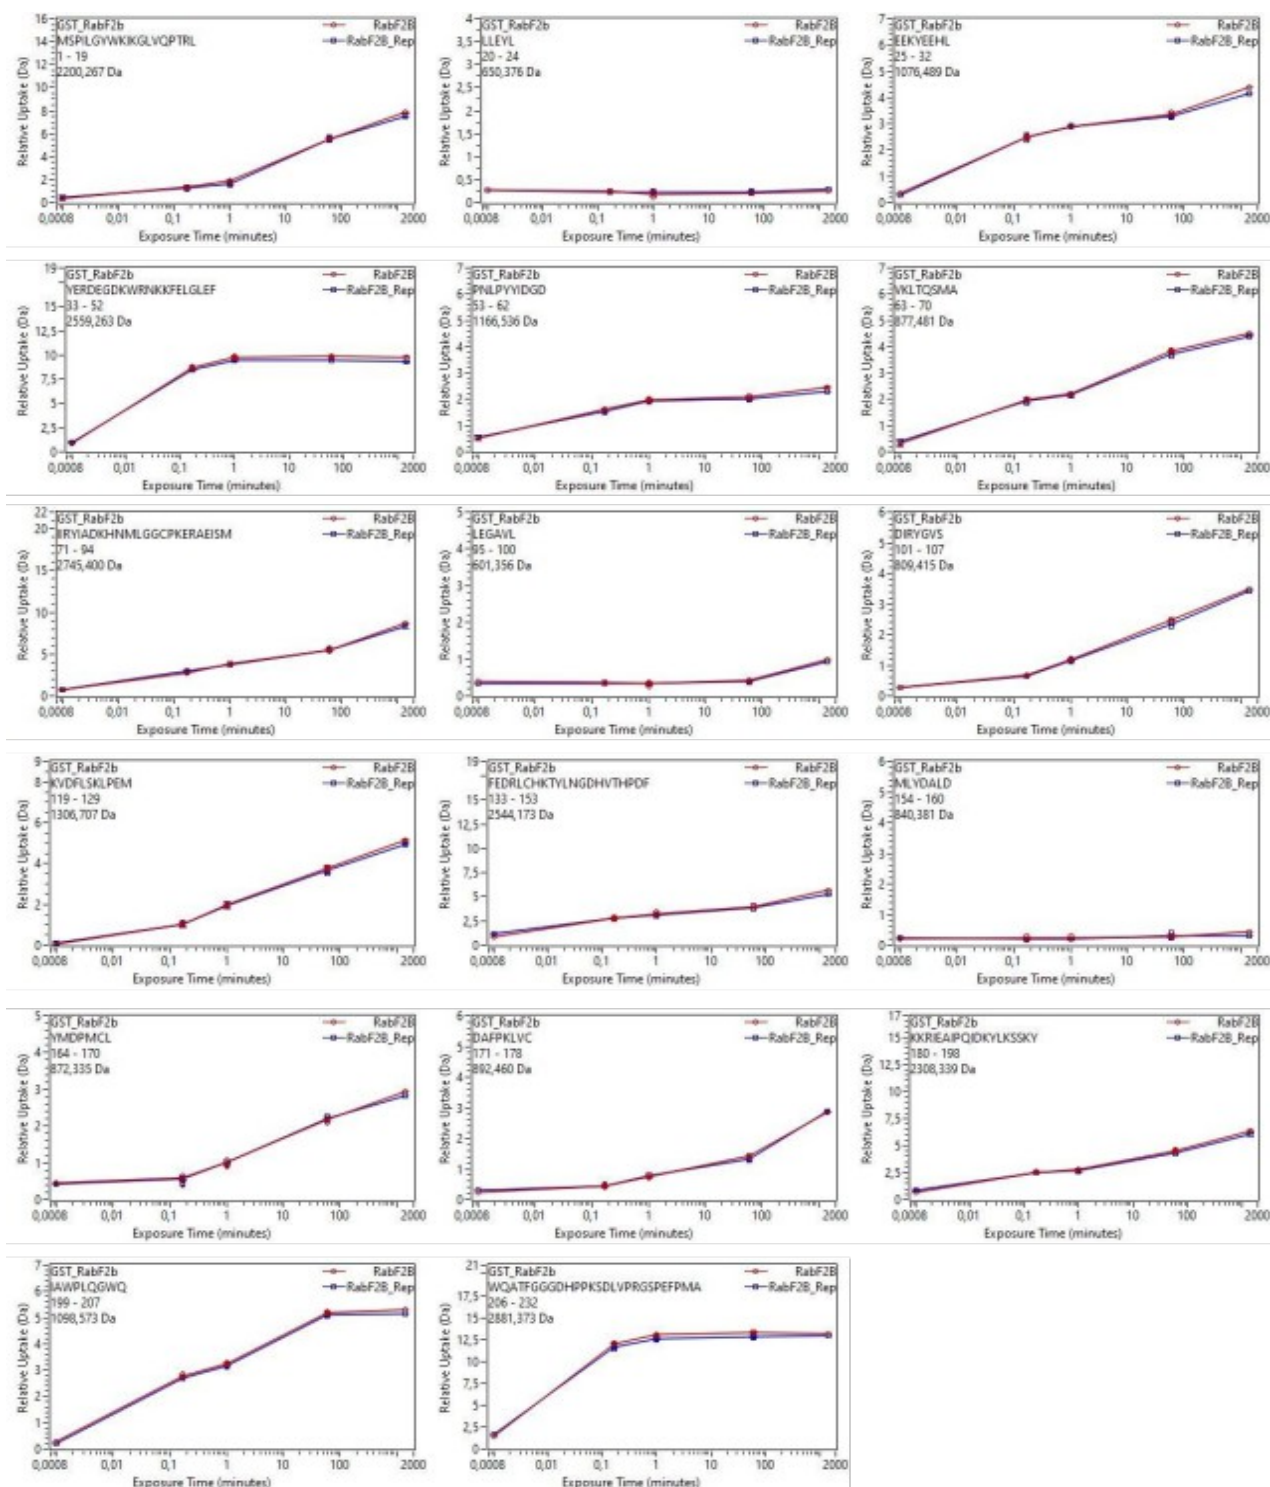

**Fig. S3 The GST protein does not show any changes in HDX upon REP-His binding**

Deuterium uptake by selected GST peptides, covering the whole peptide sequence of the protein, do not show any changes in H-D exchange upon REP binding [Da]. Each point represents the mean centroid mass of a peptide from protein or complex incubated in D<sub>2</sub>O, +/- SD. Sequences of consecutive GST peptides are denoted on the graphs. Results come from the experiment in which the interaction of GST-RabF2b with REP-His was studied.

Fig. S4

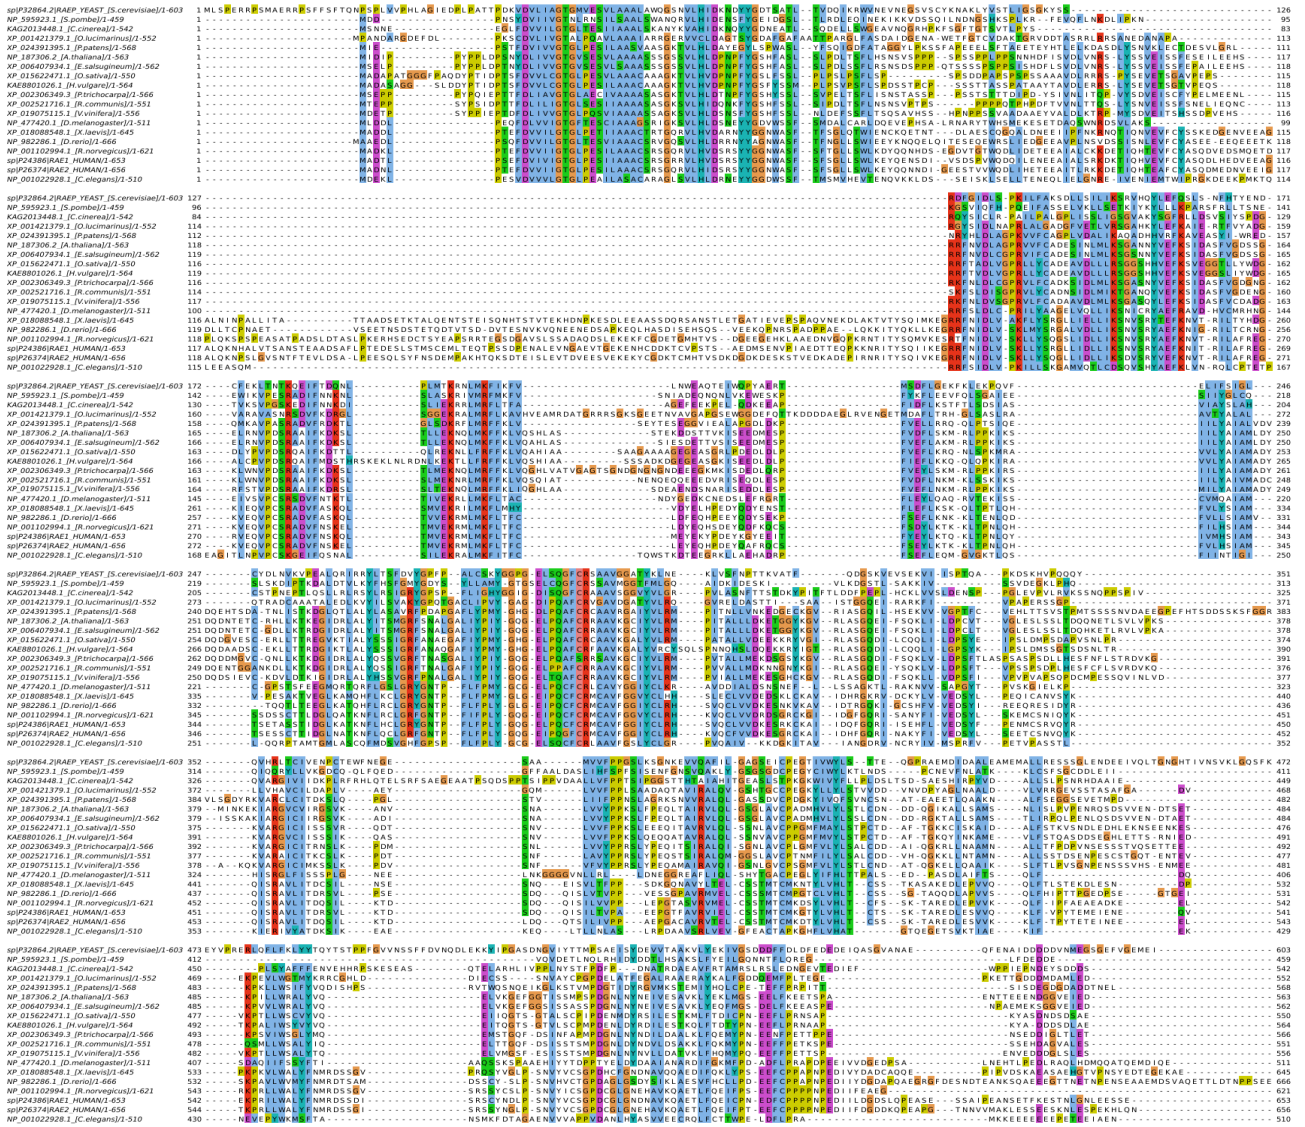

Fig. S4 Alignment of REP protein sequences from organisms representing different phylogenetic groups.

Full length amino acid sequences of REP proteins (or putative REP) from organisms representing different kingdoms of life were compared. Regions of high similarity as well as highly divergent regions are visible. In particular note the low conservation of the C-terminus. Protein alignments were calculated using MUSCLE (<http://www.ebi.ac.uk/Tools/msa/muscle/>) and edited in Jalview (<http://www.jalview.org>) to remove gaps. Amino acids are colored according to their chemical properties.

Fig. S5

**a**  
**SOPMA**

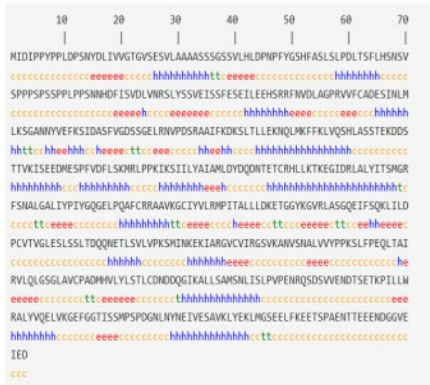

**b**  
**NetSurfP 2.0**

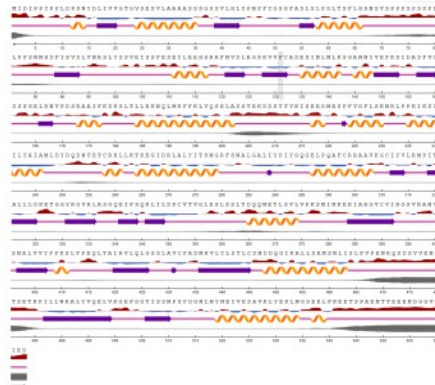

**c**  
**JPred4**

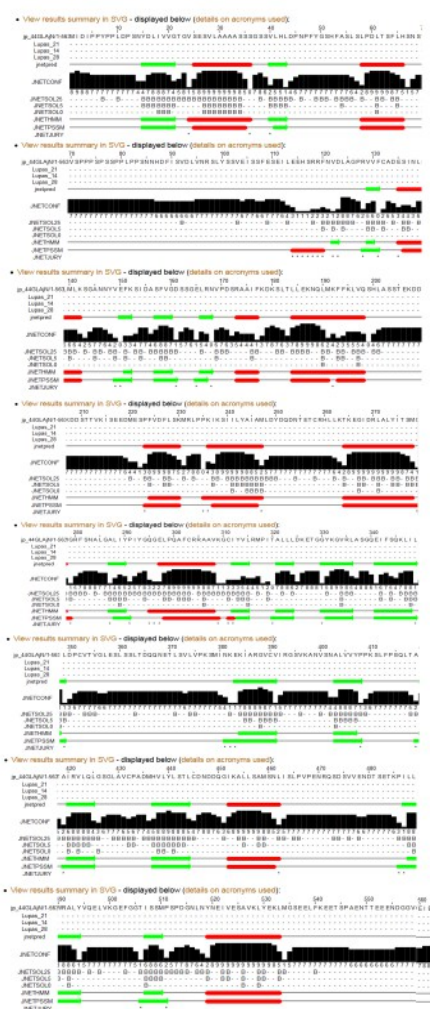

**d**  
**Gor4**

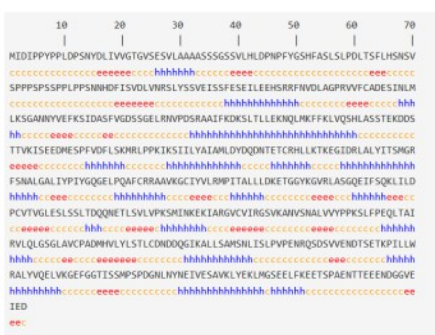

**e**  
**GlobPlot**

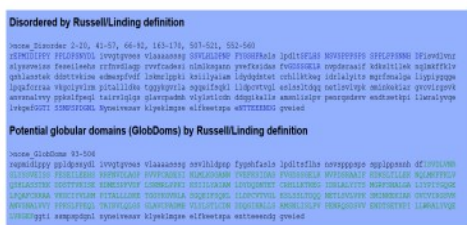

**f**  
**DisEMBL**

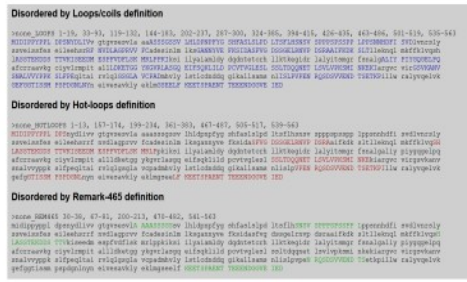

**g**  
**CFSSP**

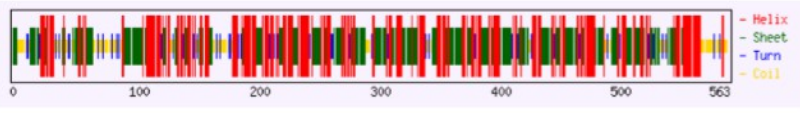

**Fig. S5 Secondary structure prediction for the amino acid sequence of the *Arabidopsis thaliana* REP protein**

Secondary structure prediction for the REP amino acid sequence was performed based on different algorithms. Note that all predictions are consistent in predicting a C-terminal helix, spanning amino acids 518-535, followed by an unstructured region.



**Fig. S6**

**a**

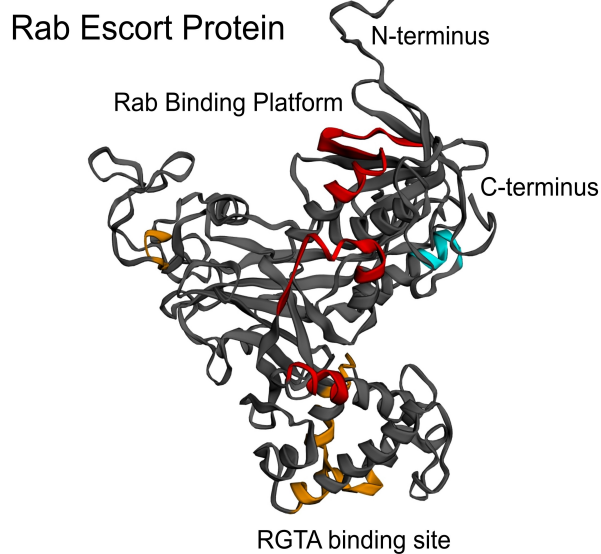

**b**

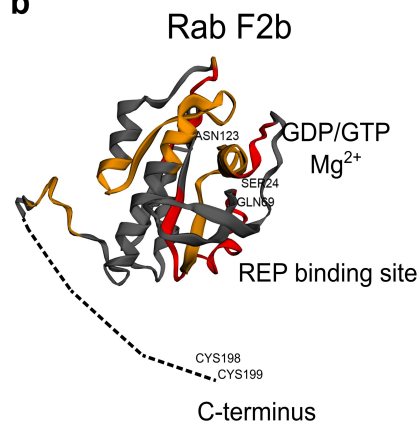

**c**

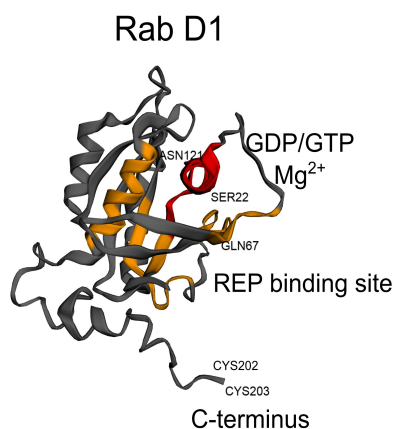

**d**

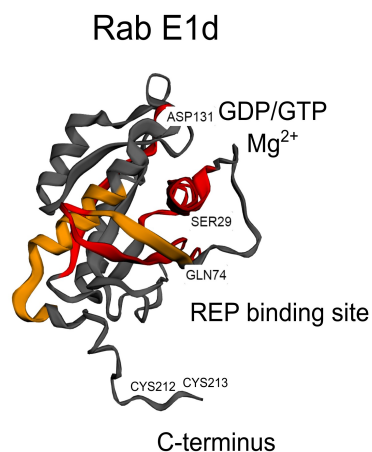

**Fig. S6 Structural models of Arabidopsis REP and selected Rab proteins**

Structural models of a) REP, b) RabF2b, c) RabD1 and d) RabE1d were built using the PHYRE2 server basing on Hidden-Markov-Model calculations. Templates for modeling were: the crystal structures of mammalian REP and yeast GDI for REP, and for Rabs crystal structures of Rab proteins from different organisms, but from corresponding families. Amino acid stretches corresponding to peptides with high HDX protection are colored in red, of lower but significant HDX protection in orange, and showing higher HDX exchange in blue. Positions of N- and C-termini of proteins are marked as well as amino acids engaged in Mg<sup>2+</sup> and guanine nucleotide binding and the prenylatable cysteines.

Fig. S7

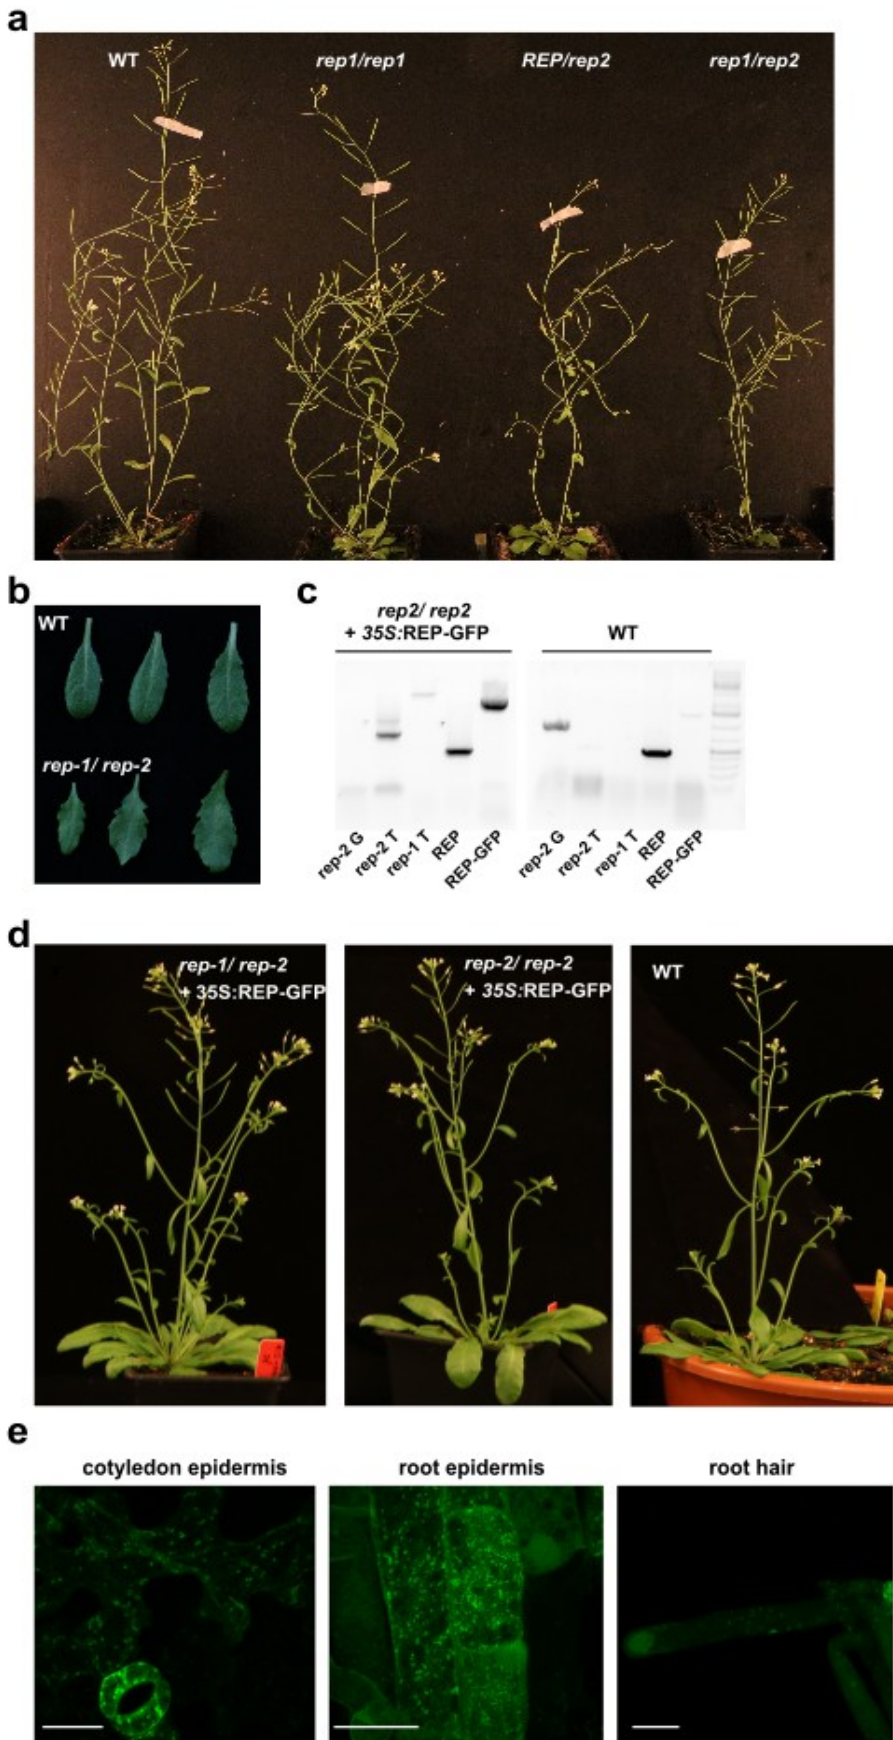

**Fig. S7 Phenotypes of *rep-1* and *rep-2* mutants and revertant plants in comparison to WT plants**

**a)** 6-week old plants grown in soil in long day conditions, note slightly retarded growth of the *rep-1/rep-2* and *REP/rep-2* lines and normal growth of the *rep-1/rep-1* line. **b)** Leaves of the *rep-1/rep-2* plants are more serrated than those of WT plants. **c)** PCR analysis of the genotype of a *rep-2/rep-2* revertant plant expressing *35S:REP-GFP* – the progeny of a *rep-1/rep-2* plant transformed with the pGWB551:REP vector. PCR analysis was run using genomic DNA as templates, with primer pairs specific for: the WT genomic sequence flanking the T-DNA insertion in the *rep-2* allele (*rep-2* G), the T-DNA insertion in the *rep-2* allele (*rep-2* T), the T-DNA insertion in the *rep-1* allele (*rep-1* T), a region of the *REP* gene upstream of both T-DNA insertions (*REP*), a region spanning the *REP-GFP* junction (*REP-GFP*). **d)** The viability of *rep-2/rep-2* plants is rescued by the *35S:REP-GFP* construct. Shown are 7-week-old plants of the genotypes *rep-1/rep-2 35S:REP-GFP* and *rep-2/rep-2 35S:REP-GFP*, both derived as progeny from a *rep-1/rep-2* parent transformed with pGWB551-REP, compared with a WT plant. **e)** CSLM images showing the intracellular localization of REP-GFP in cotyledon epidermal pavement cells, root epidermal cells, and root hairs of WT Col-0 plants. Bars represent 20  $\mu\text{m}$  for cotyledon epidermis image and 10  $\mu\text{m}$  for the other two images. Note the cytoplasmic and vesicle-like structures.

**Fig. S8**

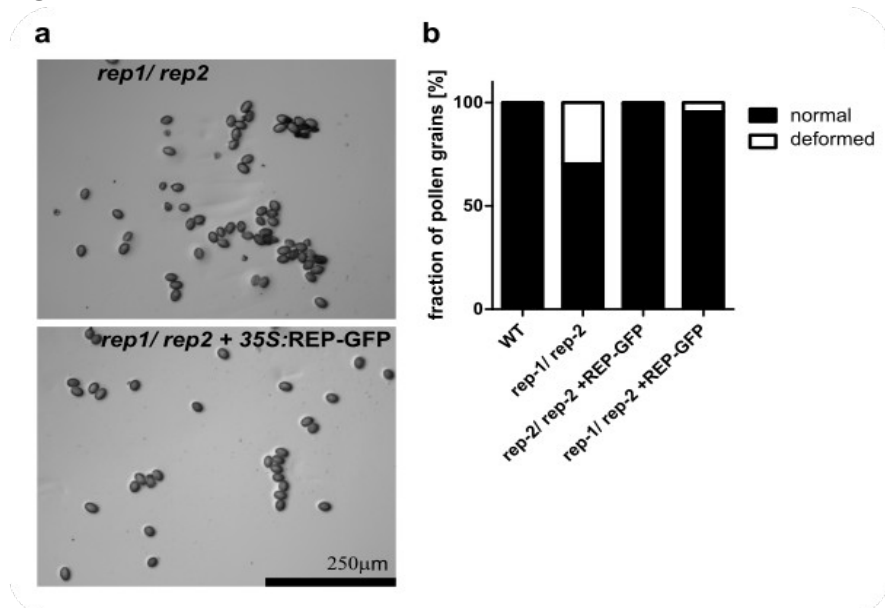

**Fig. S8 Reversion of the pollen morphology phenotype of the *rep-1/rep-2* mutant by REP-GFP expression**

a) Mature pollen grains from plants of the indicated genotypes were observed by DIC microscopy. Hardly any deformed pollen grains could be observed for the *rep-1/rep-2 35S:REP-GFP* hemizygous line. Scale bar represent 250 μm for both images. b) Pollen morphology was quantified for the lines observed in a as well as for the *rep-2/rep-2 35S:REP-GFP* hemizygous revertant line. At least 300 pollen grains were counted for each line.

**Fig. S9**

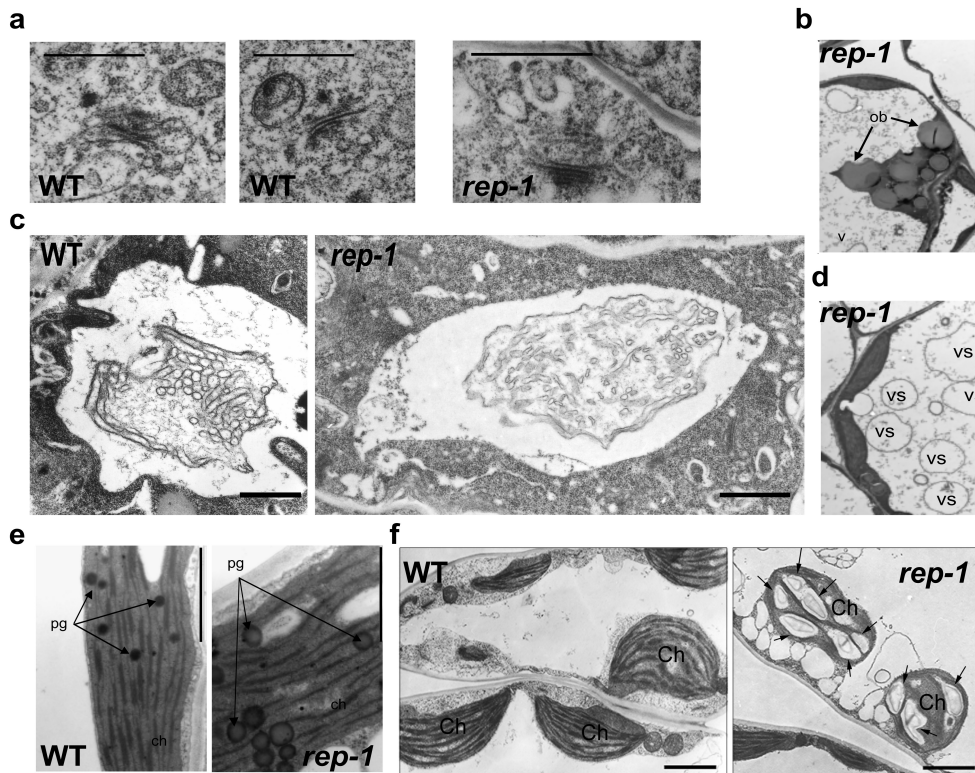

**Fig. S9 Ultrastructure of *rep-1* mutant plant cells**

Transmission electron microscopy of *Arabidopsis thaliana rep-1/rep-1* mutant tissues does not reveal significant changes in most vesicular structures in comparison to WT. **a)** Golgi structures in root parenchymal cells are similar in size and complexity, **c)** storage vacuoles in stem parenchymal cells are similar in size and shape, **b, d)** cytoplasmic clusters of oil bodies (**b**) and vesicles (**d**) were often observed in *rep-1* root parenchymal cells, but were difficult to quantify, **e, f)** intrachloroplast plastoglobules (**e**) and starch granules (**f**) were characteristically enlarged in *rep-1* leaf and stem mesophyll cells, especially if the material was gathered at the end of the dark period of the day cycle. Bars 1  $\mu\text{m}$  for b, d pictures and 2  $\mu\text{m}$  for a, c, e, f pictures. Images are representative for at least 10 pictures, each showing several structures of the kind.

Fig. S10

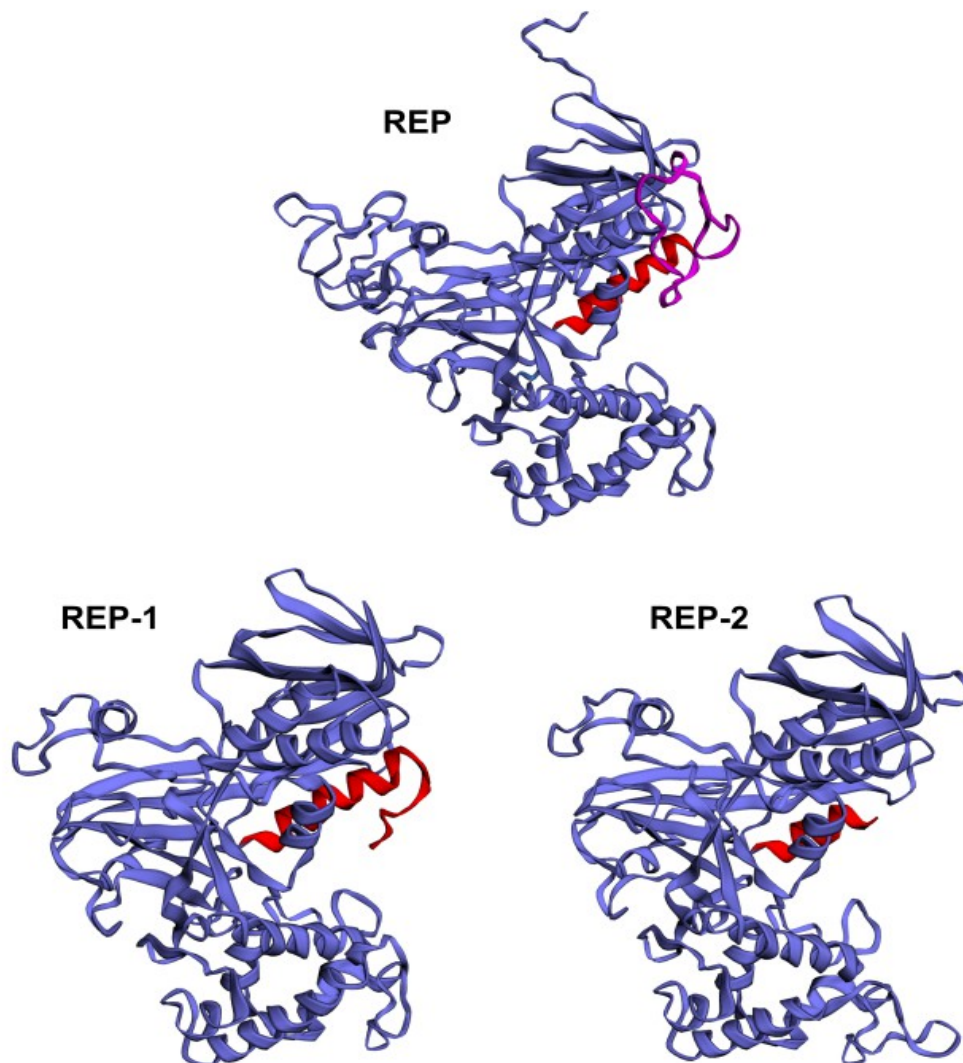

**Fig. S10 Protein models of full length plant REP, a C-terminally truncated version corresponding to the protein present in the *rep-1* mutant, and a C-terminally truncated version corresponding to the version present in the *rep-2* mutant.**

Structural models of the proteins REP, REP-1 and REP-2 were built using the PHYRE<sup>2</sup> server based on Hidden-Markov-Model calculations. Templates for modeling were the crystal structures of mammalian REP and yeast GDI. Amino acid stretches corresponding to the unstructured C-terminus are colored in magenta and the predicted C-terminal  $\alpha$ -helix is in red. In REP-1 only the unstructured C-terminus is lacking, in REP-2 the insertion disrupts the secondary structure of the  $\alpha$ -helix and possibly its tertiary interaction with the vast  $\beta$ -sheet of the larger REP domain. Note also that the modeling predicts some changes of geometry of distant tertiary structure elements, in particular of the putative RGTA binding loops of the smaller REP domain and the large loop-helix-loop structure at the opposite side of the REP molecule.

**Table S1.**

| cross                                                         | expected ratio<br><i>rep-1/rep-1</i> :<br><i>rep1/rep-2</i> :<br><i>rep-2/rep-2</i> | observed<br><i>rep-1/rep-1</i> :<br><i>rep1/rep-2</i> :<br><i>rep-2/rep-2</i> | number of<br>observations | p-value | p  |
|---------------------------------------------------------------|-------------------------------------------------------------------------------------|-------------------------------------------------------------------------------|---------------------------|---------|----|
| <i>rep-1/rep-2</i> (self)                                     | 1:1:0                                                                               | 79:73:0                                                                       | 152                       | 0.8186  | NS |
| <i>rep-1 rep-2</i><br><i>35S:REP-GFP</i> hemizygous<br>(self) | 1:1.5:0.5                                                                           | 33:91:16                                                                      | 140                       | 0.04    | *  |
|                                                               | expected ratio<br>WT :<br><i>35S:REP-GFP</i>                                        | observed<br>WT :<br><i>35S:REP-GFP</i>                                        | number of<br>observations | p-value | p  |
| <i>rep-1/rep-2</i><br><i>35S:REP-GFP</i> hemizygous<br>(self) | 1:5                                                                                 | 19:121                                                                        | 140                       | 0.616   | NS |

**Table S1. Genetic analysis of mutated *REP* alleles transmission in the *rep-1/rep-2 35S:REP-GFP* hemizygous revertant**

*rep1/rep-2* or *rep-1/rep-2 35S:REP-GFP* (hemizygous for the *35S:REP-GFP* allele) were left for self pollination. Progeny was grown on 1/2 MS agar plates for 3 weeks, DNA was isolated from whole seedlings and genotyped by PCR with appropriate primer pairs (Table S2). Results were analyzed by  $\chi^2$  test or Fisher exact test against the following  $H_0$  hypotheses: in case of *rep-1/rep-2* self-cross that *rep-2* pollen is sterile (as derived from previous crosses analyzed in Table 1); in case of the *rep-1/rep-2 35S:REP-GFP* (hemizygous for the *35S:REP-GFP* allele) that the REP-GFP expression from 35S promoter enables full reversion of the *rep-2* pollen sterility; in case of the REP-GFP construct in *rep-1/rep-2 35S:REP-GFP* (hemizygous for the *35S:REP-GFP* allele), that the segregation is Mendelian. \* marks  $p < 0.05$ , NS marks non-significant result. Note that the p-value obtained for the data *rep-1/rep-2 35S:REP-GFP* (hemizygous for the *35S:REP-GFP* allele) that the REP-GFP expression from 35S promoter enables full reversion of the *rep-2* pollen sterility is close to to rejection border ( $p < 0.05$ ) and the hypothesis does not take into account that the fitness of the *rep-1* pollen is lower than 100%.

**Table S2. List of primers used in this work**

|    | <b>Primer name</b> | <b>Primer sequence 5'-3'</b>                             | <b>Primer purpose</b>        |
|----|--------------------|----------------------------------------------------------|------------------------------|
| 1  | RabA2aR            | CGCAAGCCTTGAAATAAAGTCTCA                                 | cloning <i>RabA2a</i>        |
| 2  | RabA2aL            | GATGGCGAGAAGACCGGACGAAG                                  |                              |
| 3  | RabB1bR            | GGCATAACACGTGTATTGTCAAACCG                               | cloning <i>RabB1b</i>        |
| 4  | RabB1bL            | CATGTCTTATGCTTATCTCTTCAAG                                |                              |
| 5  | RabC2aR            | ACACACAAAAGAGGCAACCAC                                    | cloning <i>RabC2a</i>        |
| 6  | RabC2aL            | CATGGGATCTTCTTCTGGGCA                                    |                              |
| 7  | RabD1R             | TCAAGACACAGCGACATGGA                                     | cloning <i>RabD1</i>         |
| 8  | RabD1L             | CATGAGCAACGAGTACGATTATCTG                                |                              |
| 9  | RabE1dR            | GTGCAGGCGAAAAAGAGCAAT                                    | cloning <i>RabE1d</i>        |
| 10 | RabE1dL            | GATGGCGGTTGCGCCG                                         |                              |
| 11 | RabF2bR            | GACGCAAACACAGAAGTCCA                                     | cloning <i>RabF2b</i>        |
| 12 | RabF2bL            | CATGGCTGCAGCTGGAACAAGA                                   |                              |
| 13 | RabA4bR            | TCAAGAAGAAGTACAACAAGTGCTGGTC                             | cloning <i>RabA4b</i>        |
| 14 | RabA4bL            | CACCATGGCCGGAGGAGGC                                      |                              |
| 15 | Lbb1.3             | ATTTTGCCGATTTTCGGAAC                                     | genotyping SALK lines        |
| 16 | RP140044           | TCGGGTTCTGCAGCTTGGTAG                                    | genotyping <i>rep-1</i> line |
| 17 | LP140044           | TGGACTTGGCCATGAAAATCA                                    |                              |
| 18 | Go8409             | ATATTGACCATCATACTCATT                                    | genotyping GK lines          |
| 19 | RPG295F01          | TGGTAGTGGTTTAGCGGTTTG                                    | genotyping <i>rep-2</i> line |
| 20 | LPG295F01          | AACGATTATGGTTGTGATCGG                                    |                              |
| 21 | REPgwL             | CACCATGATCGACATCCCTCCTTAC                                | cloning <i>REP</i>           |
| 22 | REPgwR             | ATCTTCTATTTCAACACCACCATCGTTTTCC<br>TC                    |                              |
| 23 | BP- <i>rep</i> -F  | GGGGACAAGTTTGTACAAAAAAGCAGGCT<br>TCATGATCGACATCCCTCCTTAC | cloning <i>REPΔC</i>         |
| 24 | BP- <i>rep</i> -R  | GGGG ACCACTTTGTACAAGAA<br>AGCTGGGTCGAGCTTTTCATATAGCTTCAC | cloning <i>REPΔC</i>         |
| 25 | REP-F3             | GACCAAGGGATAAAGGCGCT                                     | qRT-PCR                      |
| 26 | REP-R4             | ACCTCAAATTCACCCTTGACT                                    | qRT-PCR                      |
| 27 | REP-F5             | TGGAATCAGCCGTGAAGCTATATG                                 | qRT-PCR                      |
| 28 | REP-R6             | TCGTTTTCTCCTCCGTTGTG                                     | qRT-PCR                      |
| 29 | g3GFP-R            | CCATCTAATTCAACAAGAATTGGGACAAC                            | RT-PCR of revertant          |
| 30 | PP2a-F             | TAACGTGGCCAAAATGATGC                                     | RT-PCR control gene          |
| 31 | PP2A-R             | GTTCTCCACAACCGCTTGGT                                     | RT-PCR control gene          |
